# Supplementary material
Source: Springer Nature journal article supplement (https://www.springermedizin.de/resource/supplementary/12874_2010_519_MOESM6_ESM.pdf/9432502)
Supplement: MOESM6 [file 9432502]

Advertisement-recruited bicycle commuters' sex-neutral mean scores for differences in ratings of the inner urban and suburban route environments

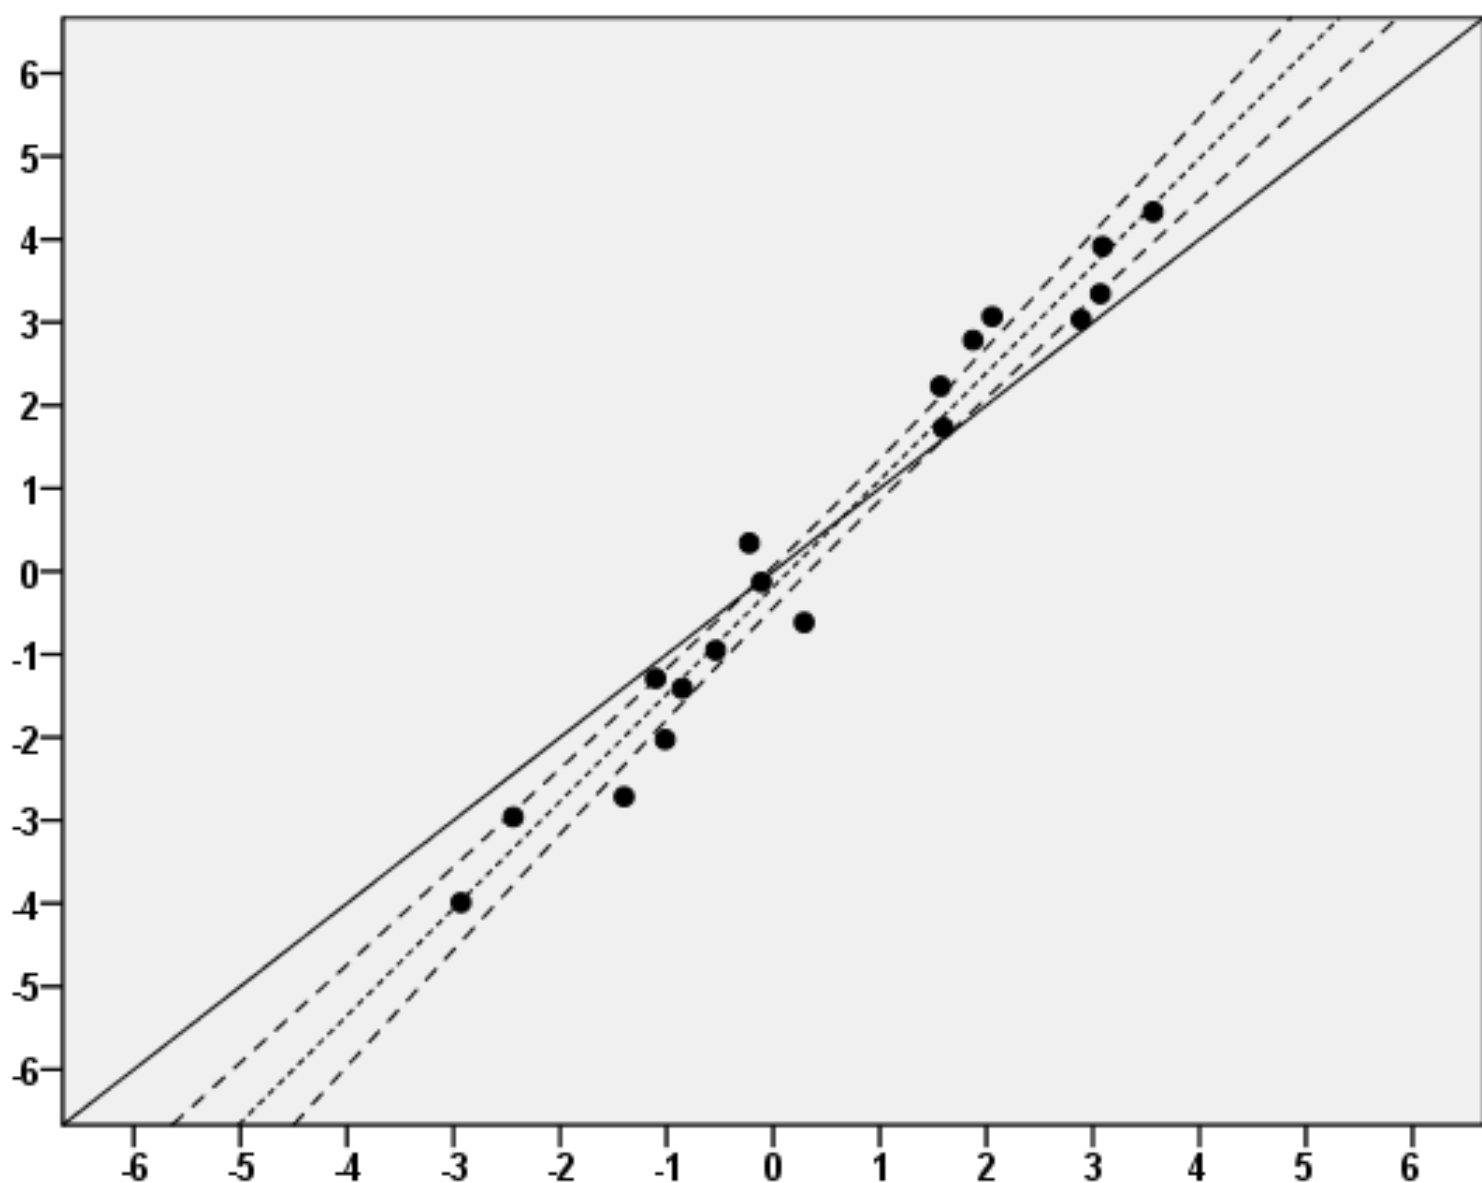

Street-recruited bicycle commuters' sex-neutral mean scores for differences in ratings of the inner urban and suburban route environments
